# Supplementary material for: HERG1A potassium channel is the predominant isoform in head and neck squamous cell carcinomas: evidence for regulation by epigenetic mechanisms
Source: PubMed Central journal article supplement (PMC4726400; doi:10.1038/srep19666), 2016-01-20

## SUPPLEMENTARY INFORMATION

**Title: HERG1A potassium channel is the predominant isoform in head and neck squamous cell carcinomas: evidence for regulation by epigenetic mechanisms**

### **AUTHORS:**

Sofía Tirados Menéndez<sup>1‡</sup>, María Ángeles Villaronga<sup>1‡</sup>, Juan P. Rodrigo<sup>1</sup>, Saúl Álvarez-Teijeiro<sup>1</sup>, Rocío G. Urduñigo<sup>2</sup>, Mario F. Fraga<sup>2,3</sup>, Carlos Suárez<sup>1</sup>, Juana María García-Pedrero<sup>1</sup>.

<sup>1</sup> Servicio de Otorrinolaringología, Hospital Universitario Central de Asturias and Instituto Universitario de Oncología del Principado de Asturias, Oviedo, Spain.

<sup>2</sup> Unidad de Epigenética del Cáncer, Instituto Universitario de Oncología del Principado de Asturias, Universidad de Oviedo, Spain.

<sup>3</sup> Department of Immunology and Oncology, National Center for Biotechnology, CNB-CSIC, Cantoblanco, Madrid E-28049, Spain

‡These authors contributed equally to this work.

### **\* Correspondence:**

Juana María García-Pedrero, PhD

Hospital Universitario Central de Asturias

Laboratorio 2 ORL - IUOPA

33006 Oviedo, Spain

Phone: +34 985107937

E-mail: [juanagp@ficyt.es](mailto:juanagp@ficyt.es)

**Table S1.** Correlation between HERG1A (NT) and HERG1 pan (CT) immunostaining (N=123)

| Characteristic                  | No. | HERG1A protein expression |          |
|---------------------------------|-----|---------------------------|----------|
|                                 |     | Negative                  | Positive |
| <b>HERG1 protein expression</b> |     |                           |          |
| Negative                        | 15  | 8                         | 7        |
| Positive                        | 108 | 3                         | 105      |

<sup>†</sup>Kendall's Tau = 0.580; *P* < 0.001

**Table S2.** Associations between HERG1A protein expression and clinicopathological findings, site, relapse and disease outcome

| Characteristic              | No. | HERG1A protein expression (%) | <i>P</i>            |
|-----------------------------|-----|-------------------------------|---------------------|
| <b>- pT classification</b>  |     |                               |                     |
| T1-T2                       | 35  | 29 (83)                       | 0.203 <sup>#</sup>  |
| T3                          | 45  | 42 (93)                       |                     |
| T4                          | 45  | 42 (93)                       |                     |
| <b>- pN classification</b>  |     |                               |                     |
| N0                          | 40  | 32 (80)                       | 0.018 <sup>†</sup>  |
| N1-3                        | 85  | 81 (95)                       |                     |
| <b>- Disease stage</b>      |     |                               |                     |
| I-II                        | 15  | 9 (60)                        | <0.001 <sup>#</sup> |
| III                         | 24  | 22 (92)                       |                     |
| IV                          | 86  | 82 (95)                       |                     |
| <b>- Pathological grade</b> |     |                               |                     |
| Well differentiated         | 35  | 28 (80)                       | 0.048 <sup>#</sup>  |
| Moderately differentiated   | 56  | 53 (95)                       |                     |
| Poorly differentiated       | 34  | 32 (94)                       |                     |
| <b>- Site</b>               |     |                               |                     |
| Pharynx                     | 61  | 58 (95)                       | 0.128 <sup>†</sup>  |
| Larynx                      | 64  | 55 (86)                       |                     |
| <b>- Tumour Recurrence‡</b> |     |                               |                     |
| No                          | 35  | 29 (80)                       | 0.028 <sup>†</sup>  |
| Yes                         | 75  | 72 (96)                       |                     |
| <b>- Distant Metastasis</b> |     |                               |                     |
| No                          | 60  | 52 (87)                       | 0.038 <sup>†</sup>  |
| Yes                         | 50  | 49 (98)                       |                     |
| <b>- Disease status</b>     |     |                               |                     |
| Alive without disease       | 29  | 24 (83)                       | 0.045 <sup>†</sup>  |
| Dead of index cancer        | 70  | 67 (96)                       |                     |
| Died of other causes        | 14  | 13 (85)                       |                     |
| <b>Total Cases</b>          | 125 | 113 (90)                      |                     |

<sup>#</sup> Chi-square and <sup>†</sup> Fisher's exact tests.

<sup>‡</sup> 15 patients who died from causes not related to the index tumour before 36 months of follow-up were excluded from the recurrence analysis.

**Table S3.** Primers used in real-time RT-PCR and qChIP \*

| GENE             | FORWARD (5' -> 3')                           | REVERSE (5' -> 3')    |
|------------------|----------------------------------------------|-----------------------|
| HERG1A           | ACCGTGAGATCATAGCACCTAA                       | ACAGGACCTGGGTGACCTTCT |
| HERG1B #         | ACAGGACCTGGGTGACCTTCT                        | ACGTCGGCGCCCAGGGACA   |
| HERG2            | GGCCTTGGTTCCTATAGCCT                         | TCCAGGGGATGTAGAGGTGA  |
| HERG3            | CGGACCTCTTGACCATTCT                          | ATTGTCTTCGCTGGCATGTC  |
| Kv 1.3           | GCCAGTTCCCGTGATTGTTT                         | CGTTTTGAAAGGGGTCTGGG  |
| KCa 3.1          | GTTTCGTGGCCAAGCTTTACA                        | GCATTAACAGCCTGCCTCTC  |
| Kv3.4            | CGCTCTTCGAGGATCCCTACT                        | TGGTGATGGAGACCAGGATGA |
| HERG2 (KCNH6)*   | ACGCTGCTGAGCCCG                              | CCTGCCCGGAGCCACA      |
| HERG3 (KCNH7)*   | GCGGGTGTCTAGAAGTGGTG                         | CTCTTTGTGGCAGAGCATCC  |
| Kv 1.3 (KCNA3)*  | GCAGCCTGACTCCCCGT                            | GCCCTCATGTTGTACCTCGG  |
| KCa 3.1 (KCNN4)* | TGTTTGGGTGTGGCTCTTTG                         | GTCCACACACAGGCACAAAT  |
| Kv 3.4 (KCNC4)*  | TGCCTCCTCTTCGTCTCCTC                         | CTCCAACACCCCTCCCGAG   |
| HERG1 (KCNH2)*   | CCCGCAGTCCAGTCTTGG                           | CAGCACTAGGCTTCGGGTG   |
|                  | <b>Probe</b> 6-FAM-CGCCCCGTGCTCGGCTTGG-TAMRA |                       |

# Primer sequences taken from Pillozi *et al.* [13].

## Figure Legends

**Figure S1.** Analysis of HERG2 and HERG3 mRNA levels by real-time RT-PCR in HNSCC-derived cell lines. Data are expressed as the fold change in HERG2 or HERG3 levels in the HNSCC-derived cell lines normalised to L19 mRNA levels. The graphs represent the means + SD of at least two independent experiments performed in quadruplicate. SH-SY5Y cells served as a positive control.

**A**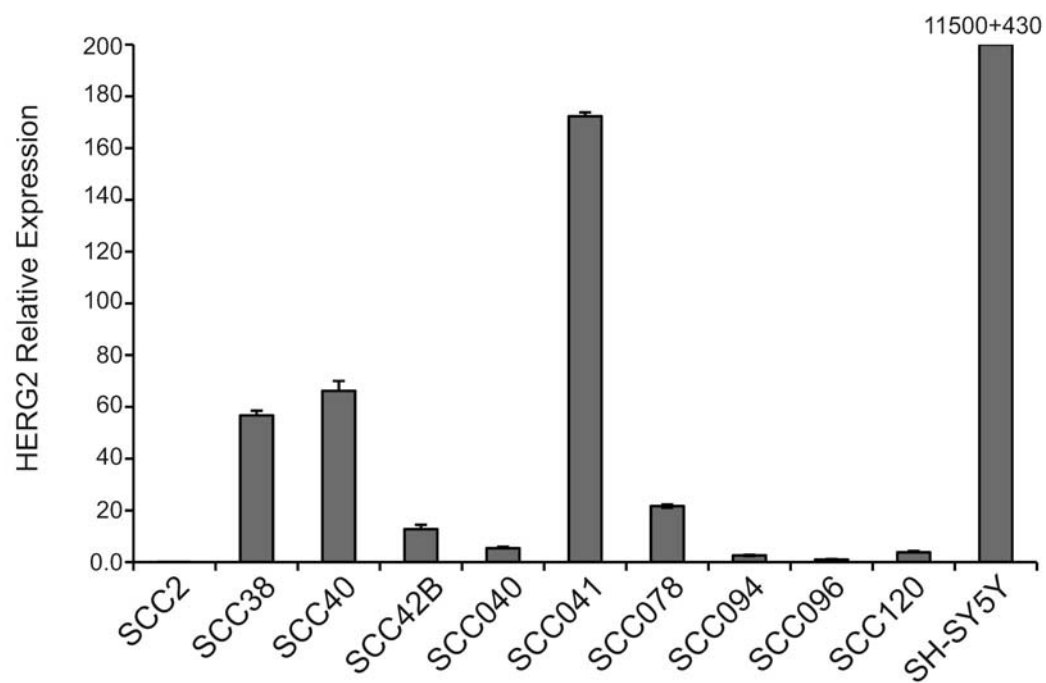**B**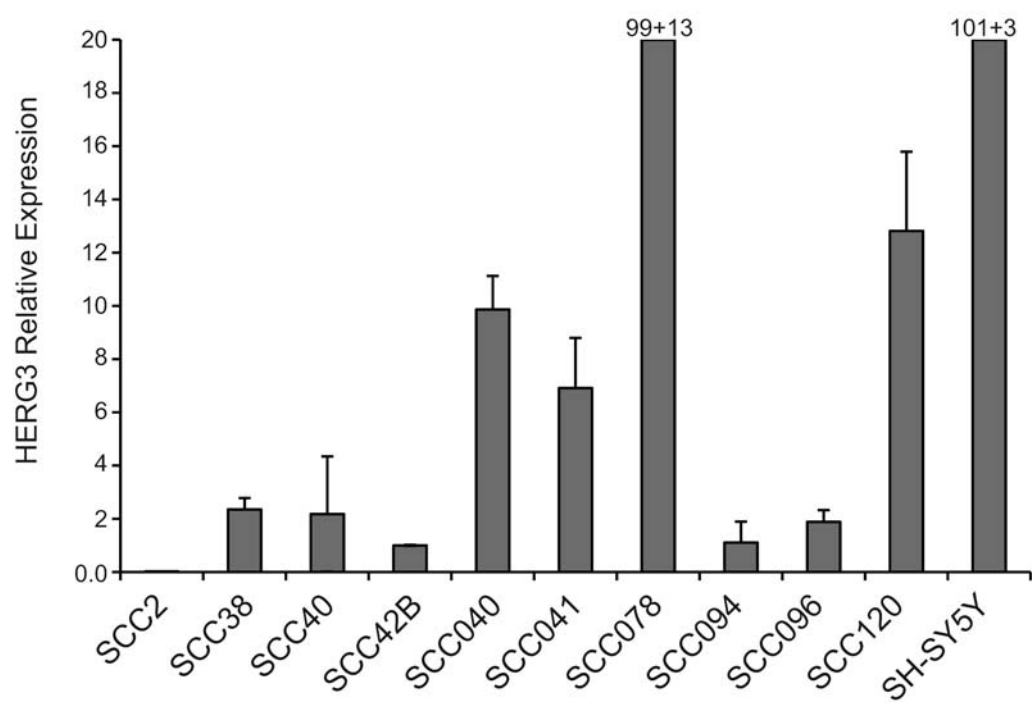

Supplement: srep19666-s1.pdf [file srep19666-s1.pdf]
